# Supplementary material for: Development of a novel Hsp90 inhibitor NCT-50 as a potential anticancer agent for the treatment of non-small cell lung cancer
Source: PubMed Central journal article supplement (PMC6141536; doi:10.1038/s41598-018-32196-6), 2018-09-17

**Development of a novel Hsp90 inhibitor NCT-50 as a potential anticancer agent for the treatment of non-small cell lung cancer**

Seung Yeob Hyun, Huong Thuy Le, Cong-Truong Nguyen, Young-Sik Yong, Hye-Jin Boo, Ho Jin Lee, Ji-Sun Lee, Hye-Young Min, Jihyae Ann, Jie Chen, Hyun-Ju Park, Jeewoo Lee, Ho-Young Lee

**Figure 3c**

**H1299 anti-Cleaved PARP : 89 kDa**

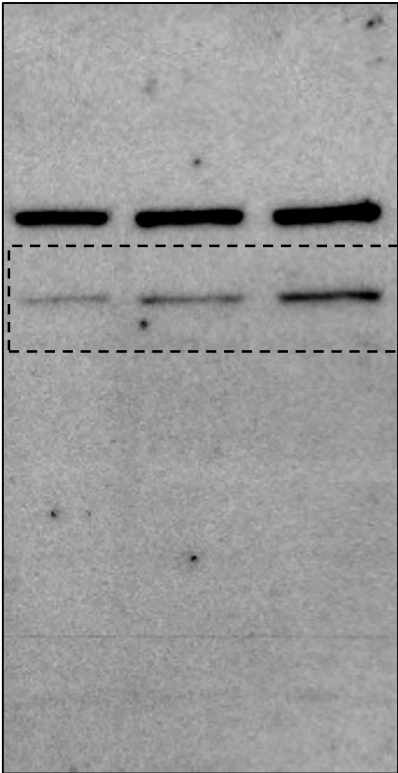

**H1299 anti-Actin: 45 kDa**

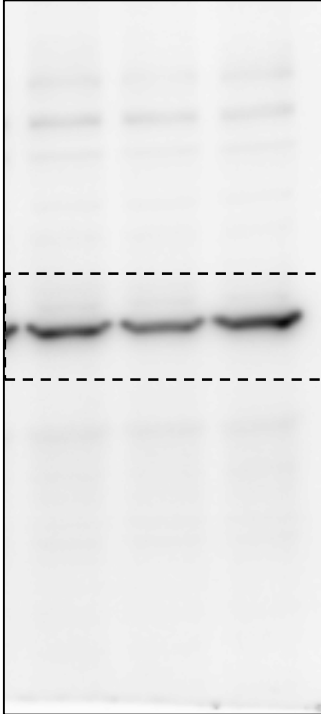

**H460 anti-cleaved PARP (89 kDa)**

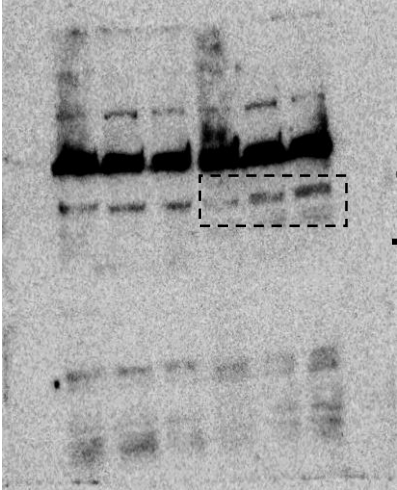

**H460 anti-actin (45 kDa)**

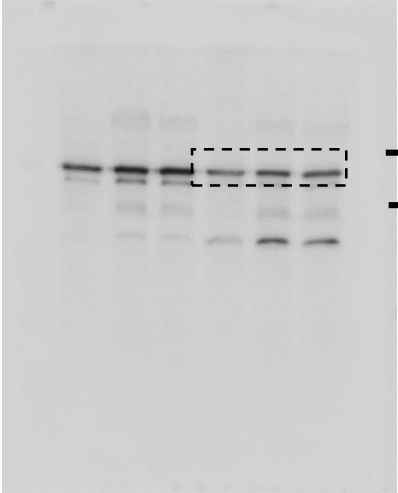

**Figure 5a**

**H1299 anti-HIF1 $\alpha$  (120 kDa)**

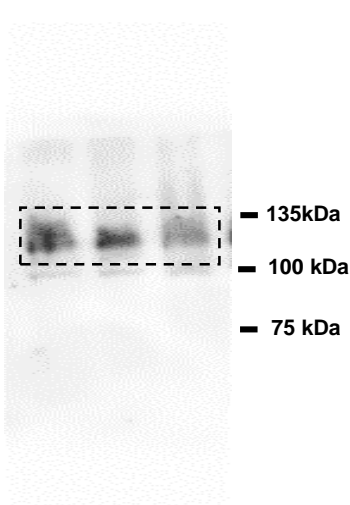

**H1299 anti-Tubulin (55 kDa)**

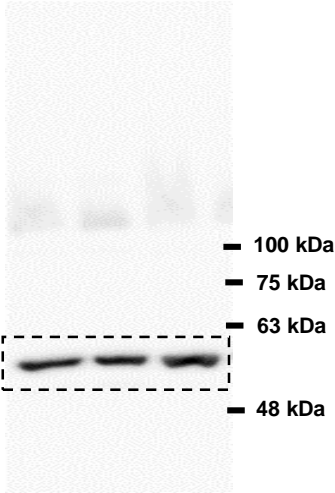

**H460 anti-HIF-1 $\alpha$  : 120 kDa**

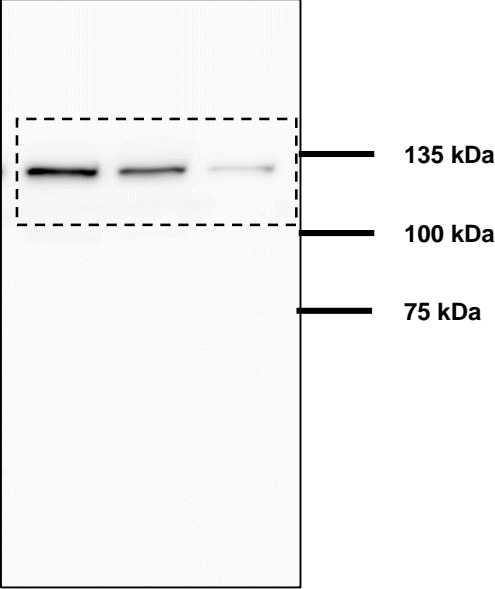

**H460 Anti-Actin: 45 kDa**

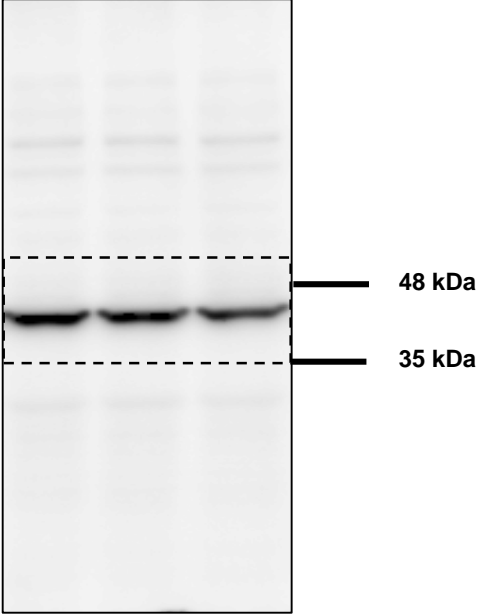

# Figure 5b

H1299 anti- EGFR (175 kDa)

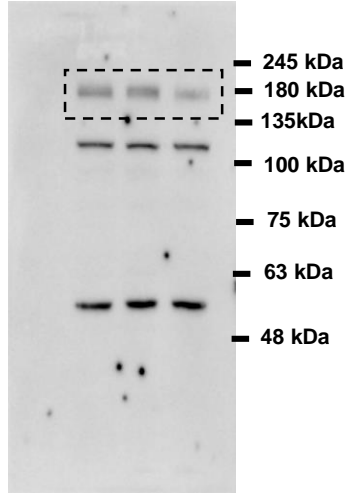

H1299 anti-IGF1R (95 kDa)

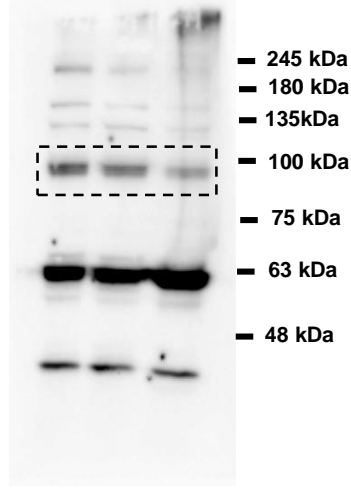

H1299 anti-Akt (60 kDa)

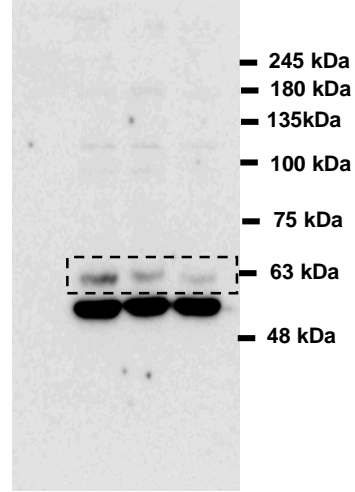

H1299 anti-Tubulin (55 kDa)

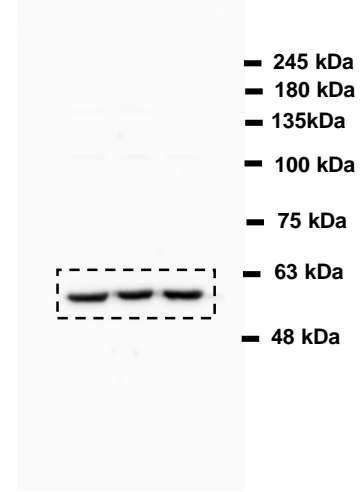

H1299 anti-MEK1/2 (45 kDa)

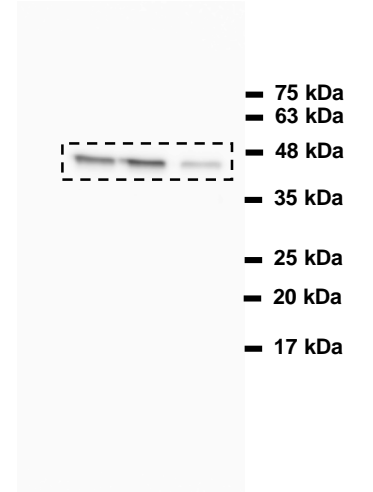

H460 anti- EGFR (175 kDa)

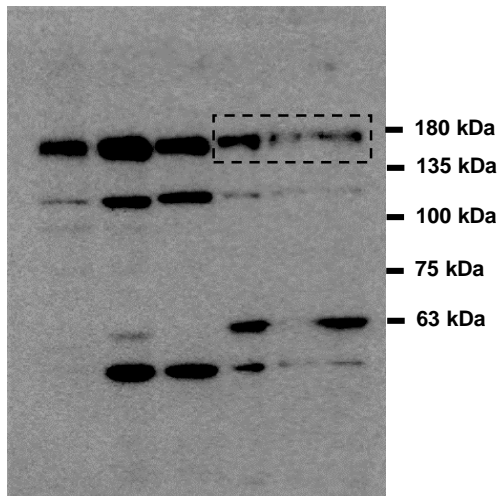

H460 anti-IGF1R (95 kDa)

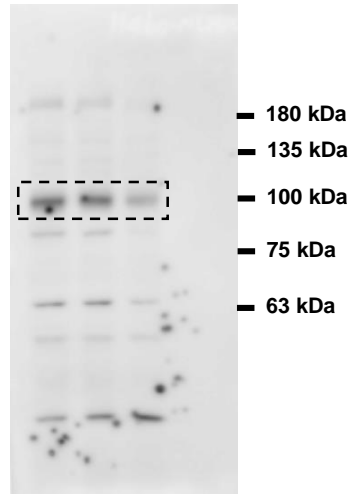

H460 anti-Akt (60 kDa)

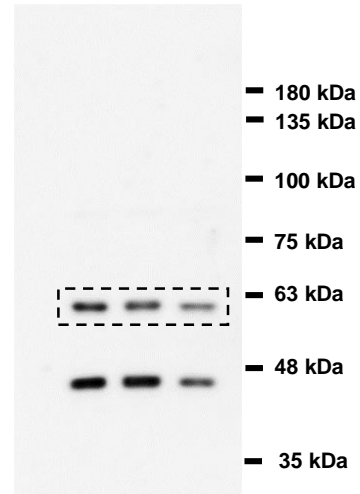

H460 anti-Tubulin (55 kDa)

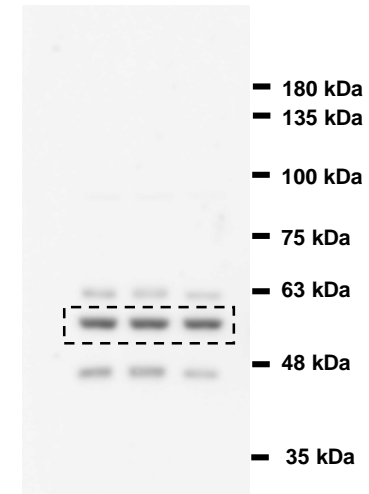

H460 anti-MEK1/2 (45 kDa)

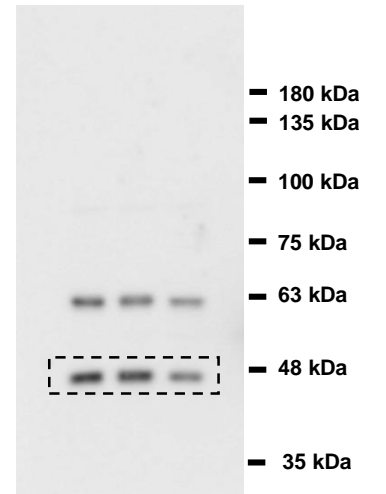

**Figure 5g**

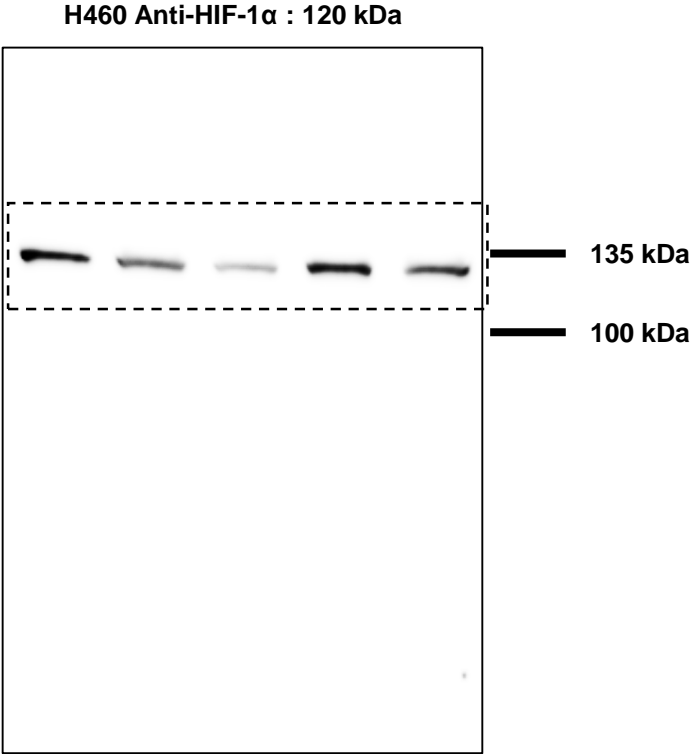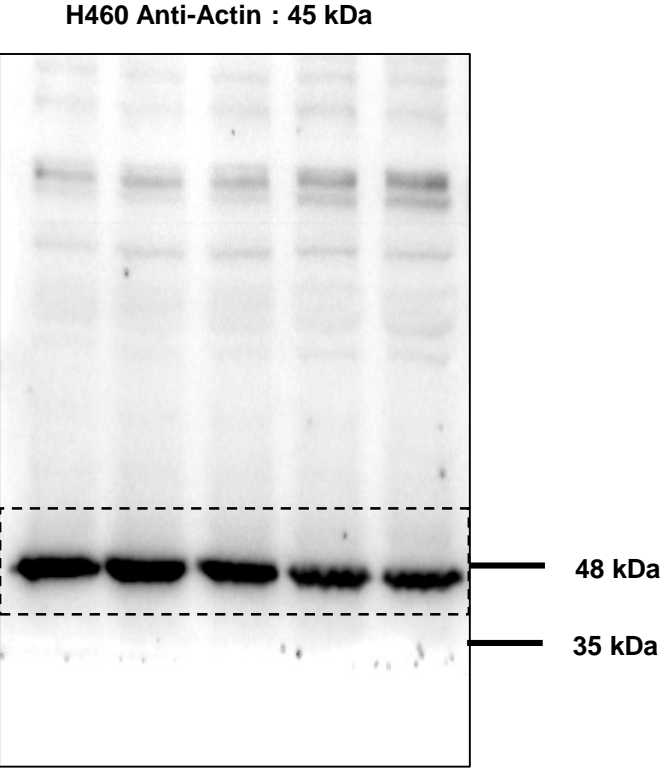

**Figure 6a**

**H1299 Anti-HIF-1 $\alpha$  : 120 kDa**

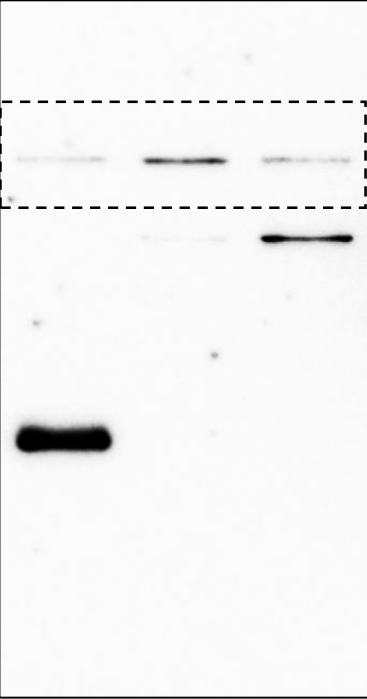

**H1299 Anti-Hsp90 : 90 kDa**

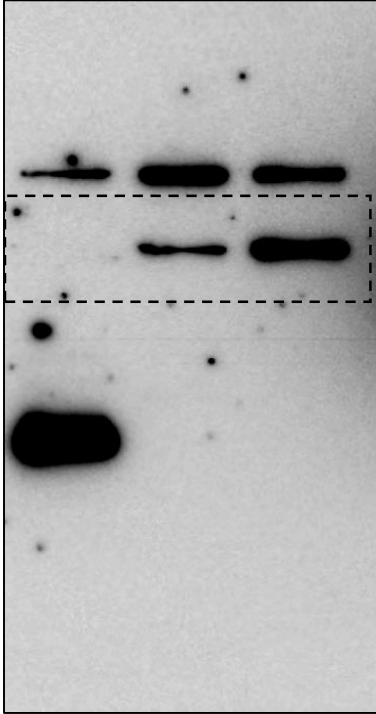

**H460 Anti-HIF-1 $\alpha$  : 120 kDa**

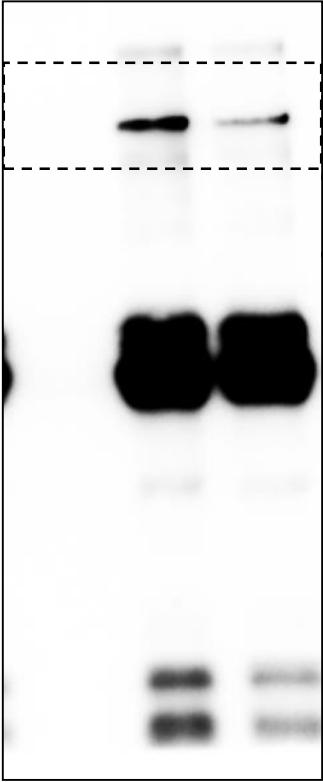

**H460 Anti-Hsp90 : 90 kDa**

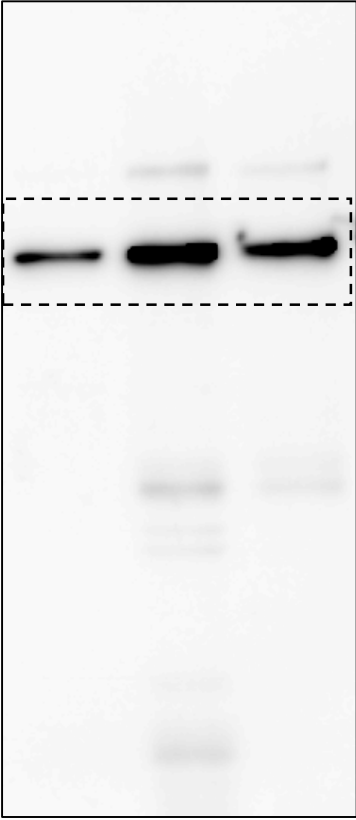

**Figure 6a**

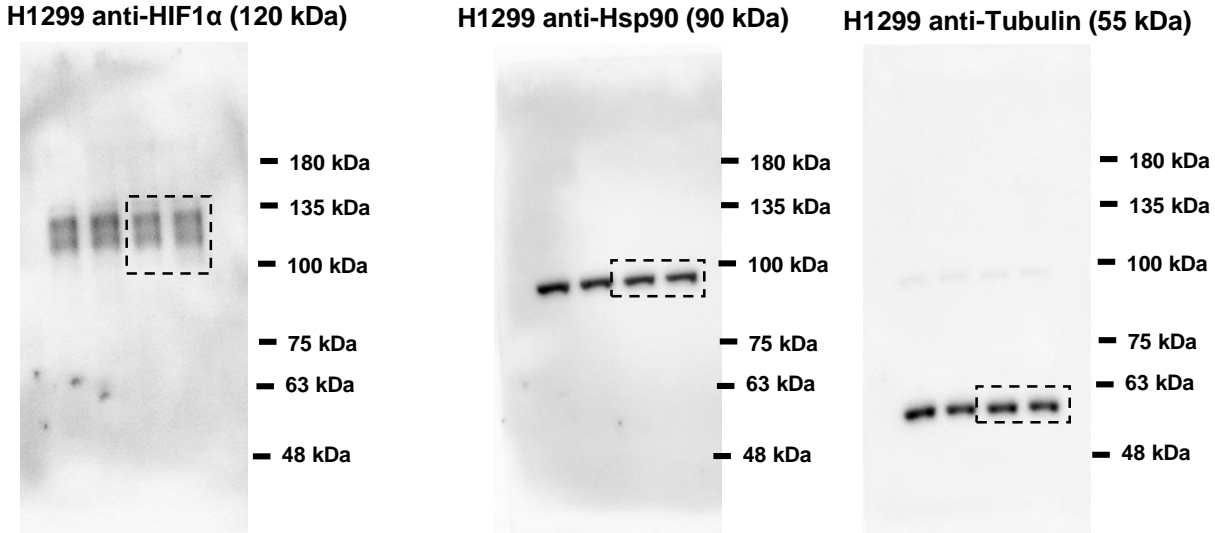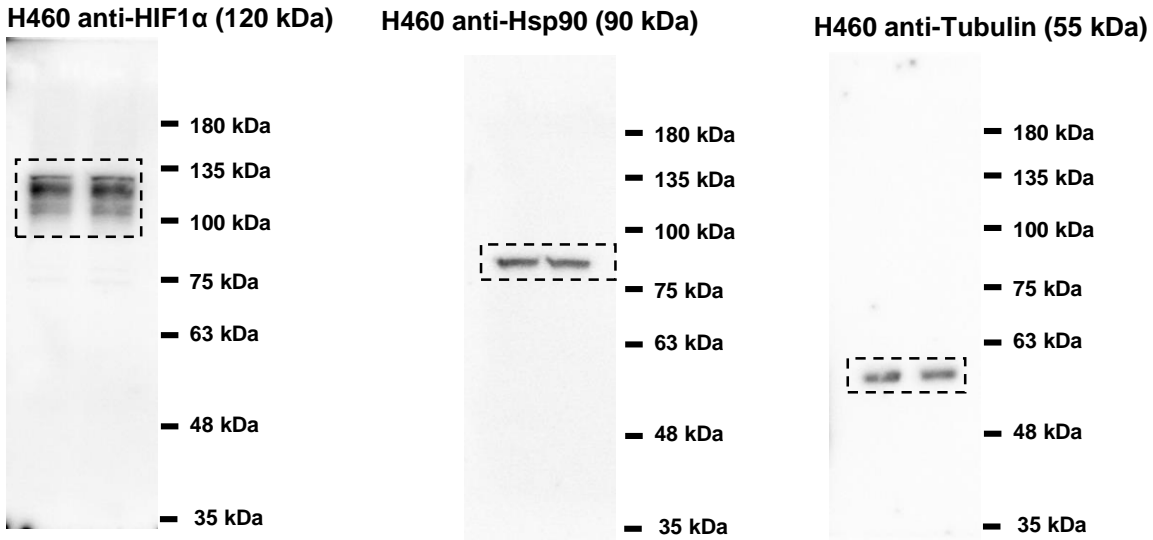

**Figure 6b**

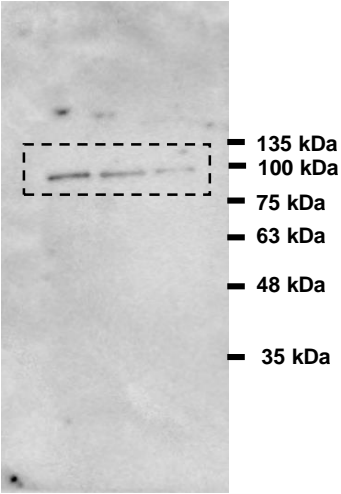



**Figure 6c**

**FL-Hsp90 (90 kDa)**

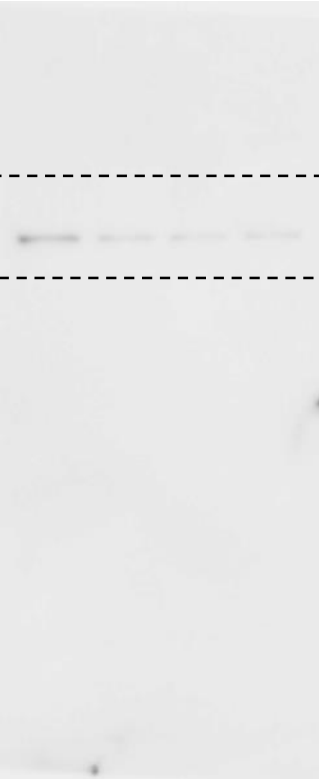

100 kDa  
75 kDa  
63 kDa  
48 kDa  
35 kDa  
25 kDa  
20 kDa  
17 kDa

**N-Hsp90 (45 kDa)**

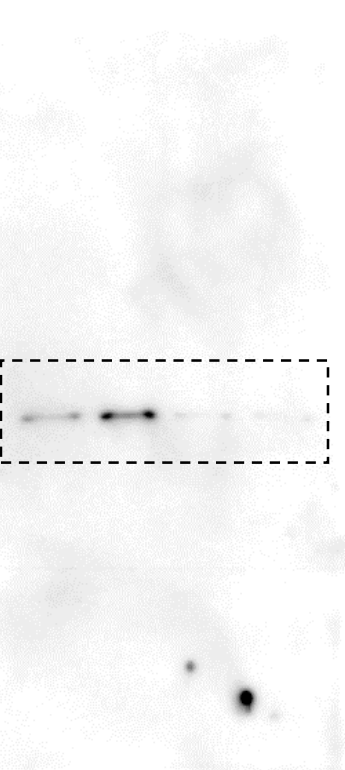

100 kDa  
75 kDa  
63 kDa  
48 kDa  
35 kDa  
25 kDa  
20 kDa  
17 kDa

**M-Hsp90 (29 kDa)**

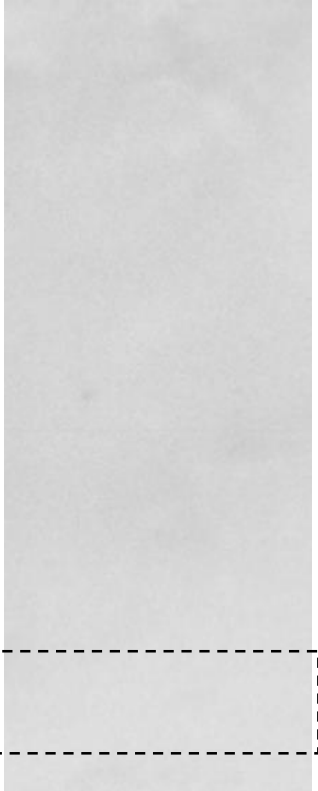

100 kDa  
75 kDa  
63 kDa  
48 kDa  
35 kDa  
25 kDa

**C-Hsp90 (27 kDa)**

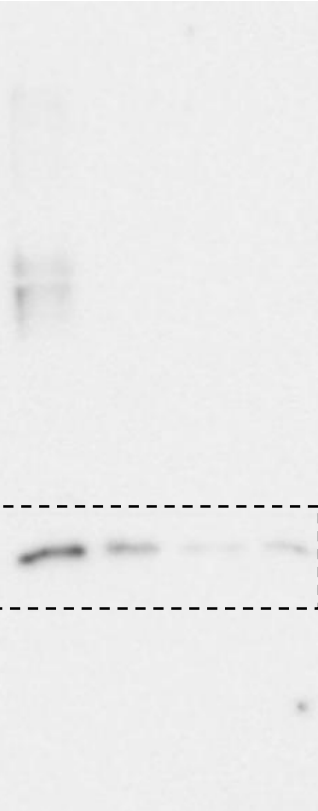

100 kDa  
75 kDa  
63 kDa  
48 kDa  
35 kDa  
25 kDa  
20 kDa  
17 kDa

**Figure 6d**

**N-Hsp90 (45 kDa)**

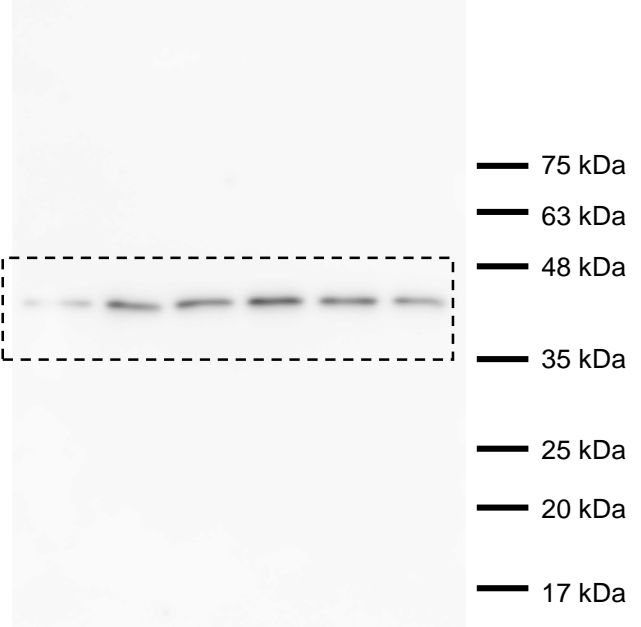

**C-Hsp90 (27 kDa)**

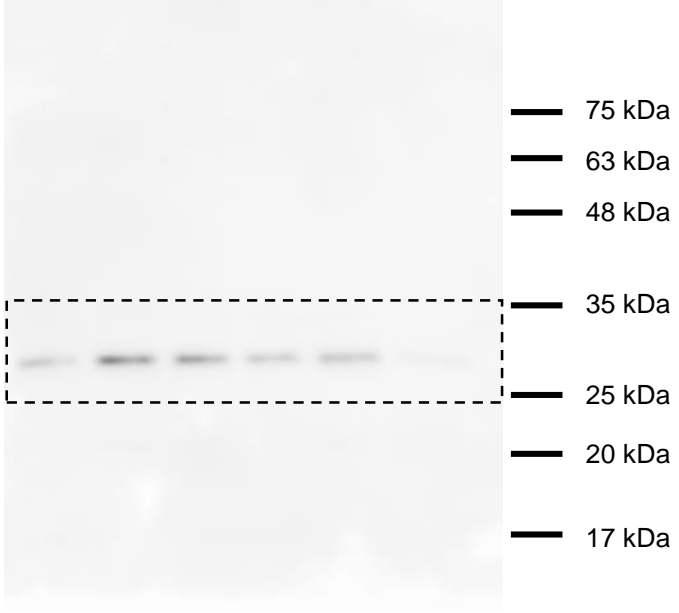

Supplement: 41598_2018_32196_MOESM1_ESM.pdf [file 41598_2018_32196_MOESM1_ESM.pdf]
